# Supplementary material for: Epidemiology and genetic diversity of Anaplasma ovis in goats in Corsica, France
Source: PubMed Central journal article supplement (PMC6318933; doi:10.1186/s13071-018-3269-7), 2019-01-03

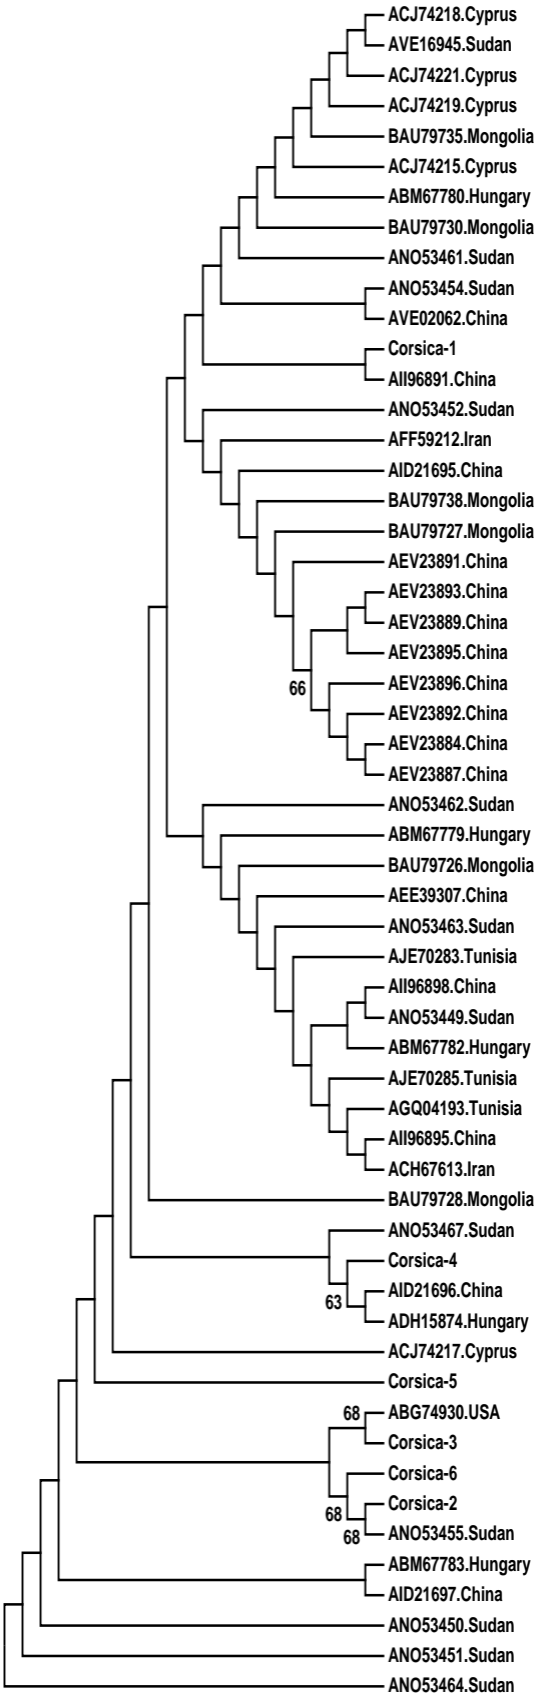

Supplement: 13071_2018_3269_MOESM2_ESM.pdf [file 13071_2018_3269_MOESM2_ESM.pdf]
